# Supplementary material for: Structural and functional analyses explain Pea KAI2 receptor diversity and reveal stereoselective catalysis during signal perception
Source: PubMed Central journal article supplement (PMC8837635; doi:10.1038/s42003-022-03085-6), 2022-02-11
Supplement: 42003_2022_3085_MOESM2_ESM.pdf [file 42003_2022_3085_MOESM2_ESM.pdf]

## Description of Additional Supplementary Files

**File name:** Supplementary Data 1

**Description:** Source data for Fig. 1-6, 8, and Supplementary Fig. 5-6, 8-9, 11.
